# Supplementary material for: Electric–elastic properties of a novel high-quality CdTeMoO6 piezoelectric crystal
Source: Royal Society of Chemistry journal article supplement (doi:10.1039/c8ce01196f), 2018-01-01
Supplement: c8ce01196f1.pdf [file c8ce01196f1.pdf]

## Electronic Supplementary Information

### Electric-elastic properties of a novel high-quality CdTeMoO<sub>6</sub> piezoelectric crystal

Conggang Li, Zeliang Gao\*, Xiangxin Tian, Qian Wu, Weiqun Lu, Youxuan Sun and Xutang Tao\*

State Key Laboratory of Crystal Materials & Institute of Crystal Materials, Shandong University, No. 27 Shanda South Road, Jinan 250100, P. R. China

**Table S1.** The direction and magnitude of the dipole moments of the TeO<sub>4</sub>, MoO<sub>4</sub> polyhedrons in CdTM crystal.

| Dipole moment    |      |      |         |           |                       |
|------------------|------|------|---------|-----------|-----------------------|
| Species          | x(a) | y(b) | z(c)    | Magnitude |                       |
|                  |      |      |         | debye     | esu·cm/Å <sup>3</sup> |
| TeO <sub>4</sub> | 0    | 0    | 11.9907 | 11.9907   | 0.0948                |
| MoO <sub>4</sub> | 0    | 0    | -6.9996 | 6.9996    | 0.0554                |
| Asymmetric unit  | 0    | 0    | 4.9911  | 4.9911    | 0.0395                |
| Unit cell        | 0    | 0    | 0       | 0         | 0                     |

**Table S2.** Local dipole moment calculation for MoO<sub>4</sub> and TeO<sub>4</sub>.

| Mo <sub>4</sub> in CdTM  |       |             | Cart. Coord.          |             |             | distance              | unit vector |             |             | dipole moment for each |             |             |                  |       |
|--------------------------|-------|-------------|-----------------------|-------------|-------------|-----------------------|-------------|-------------|-------------|------------------------|-------------|-------------|------------------|-------|
| Z                        | atom  | charges     | x                     | y           | z           | Å                     | x           | y           | z           | unitized Vec           | C_grav      | C_charge    | u_debye          |       |
| 42                       | Mo1   | 5.592961187 | 0                     | 0           | 0           |                       |             |             |             |                        |             |             |                  |       |
| 8                        | O2    | -1.1143669  | -1.1474676            | 1.1474676   | 0.92376895  | 1.867274179           | -0.61451479 | 0.61451479  | 0.494715217 | 1                      | 0.16        | 0.200221561 | 16.41057936      |       |
| 8                        | O2    | -1.1143669  | 1.1474676             | -1.1474676  | 0.92376895  | 1.867274179           | 0.61451479  | -0.61451479 | 0.494715217 | 1                      | 0.16        | 0.200221561 | 16.41057936      |       |
| 8                        | O3    | -1.68211369 | -0.9514683            | -0.9514683  | -1.04881075 | 1.706044502           | -0.55770427 | -0.55770427 | -0.61476166 | 1                      | 0.16        | 0.210073589 | 18.89900923      |       |
| 8                        | O3    | -1.68211369 | 0.9514683             | 0.9514683   | -1.04881075 | 1.706044502           | 0.557704268 | 0.557704268 | -0.61476166 | 1                      | 0.16        | 0.210073589 | 18.89900923      |       |
|                          |       |             | Cell Volume           |             |             | 252.893316            |             |             |             | Dipole Moment          |             |             | Magnitude        |       |
|                          |       |             | Z                     |             |             | 2                     |             |             |             | x                      | y           | z           |                  |       |
|                          |       |             | Total Dipole Moment = | 0.055356512 |             | esu*cm/Å <sup>3</sup> | 0           |             |             | 0                      | 0           | -6.99964593 | <b>6.9996459</b> | debye |
| TeO <sub>4</sub> in CdTM |       |             | Cart. Coord.          |             |             | distance              | unit vector |             |             | dipole moment for each |             |             |                  |       |
| Z                        |       | charges     | x                     | y           | z           | Å                     | x           | y           | z           | unitized               | C_grav      | C_charge    | u_debye          |       |
| 52                       | Te(1) | 3.719920153 | 0                     | 0           | 0           |                       |             |             |             |                        |             |             |                  |       |
| 8                        | O1    | -1.25130815 | 1.0069398             | 1.0069398   | -1.20094494 | 1.862826957           | 0.540543928 | 0.540543928 | -0.64468948 | 1                      | 0.133333333 | 0.160804536 | 13.51702892      |       |
| 8                        | O1    | -1.25130815 | -1.0069398            | -1.0069398  | -1.20094494 | 1.862826957           | -0.54054393 | -0.54054393 | -0.64468948 | 1                      | 0.133333333 | 0.160804536 | 13.51702892      |       |
| 8                        | O2    | -0.60865192 | 1.4940324             | -1.4940324  | -0.41173184 | 2.152623686           | 0.694051826 | -0.69405183 | -0.19126977 | 1                      | 0.133333333 | 0.151324378 | 10.34899276      |       |
| 8                        | O2    | -0.60865192 | -1.4940324            | 1.4940324   | -0.41173184 | 2.152623686           | -0.69405183 | 0.694051826 | -0.19126977 | 1                      | 0.133333333 | 0.151324378 | 10.34899276      |       |
| 2                        | Lp    | -2          | 0                     | 0           | 1.027205687 | 1.027205687           | 0           | 0           | 1           | 1                      | 0.037037037 | 0.076510977 | 9.396737851      |       |
|                          |       |             | Cell Volume           |             |             | 252.893316            |             |             |             | Dipole Moment          |             |             | Magnitude        |       |
|                          |       |             | Z                     |             |             | 2                     |             |             |             | x                      | y           | z           |                  |       |
|                          |       |             | Total Dipole Moment = | 0.094828396 |             | esu*cm/Å <sup>3</sup> | 0           |             |             | 0                      | 0           | -11.9907338 | <b>11.990734</b> | debye |
